# Supplementary material
Source: publisher figshare collection journal article supplement (https://frontiersin.figshare.com/ndownloader/files/26854829)
Supplement: Supplementary file [file 26854829]

# Supplementary Data

(Figures)

**Supplementary Fig. 1a : Gating strategy for sorting CXCR4/CCR5 expressing CD4+ T lymphocyte subsets**

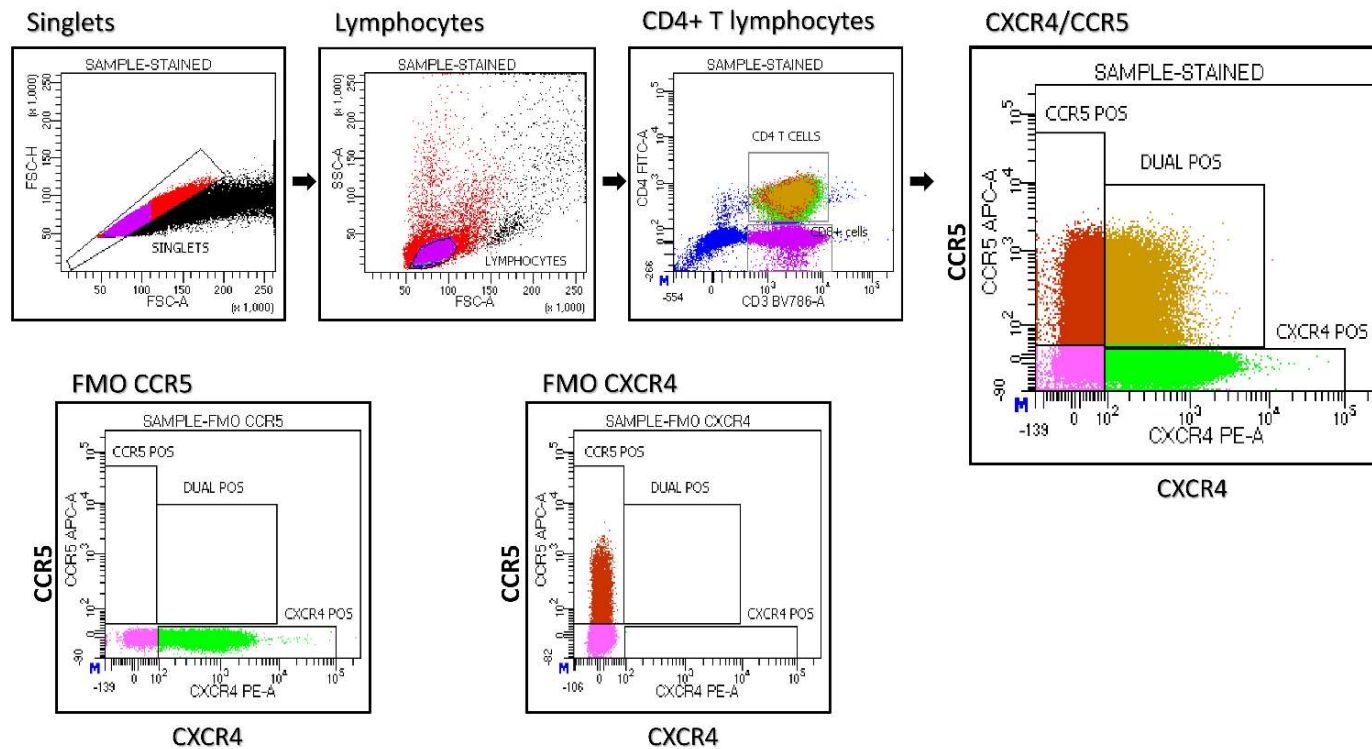

**Supplementary Fig. 1a** - Representative plots displaying gating strategy for FACS sorting of CD4+ T lymphocyte subsets expressing co-receptors CXCR4 and CCR5 with fluorescence minus one (FMO) controls. Three populations were sorted; CD4+ T cells singly positive for CXCR4, singly positive for CCR5 and dual-positive for both co-receptors.

**Supplementary Fig. 1b : Gating strategy for sorting  $\beta 7$ /CCR5 expressing CD4+ T lymphocyte subsets**

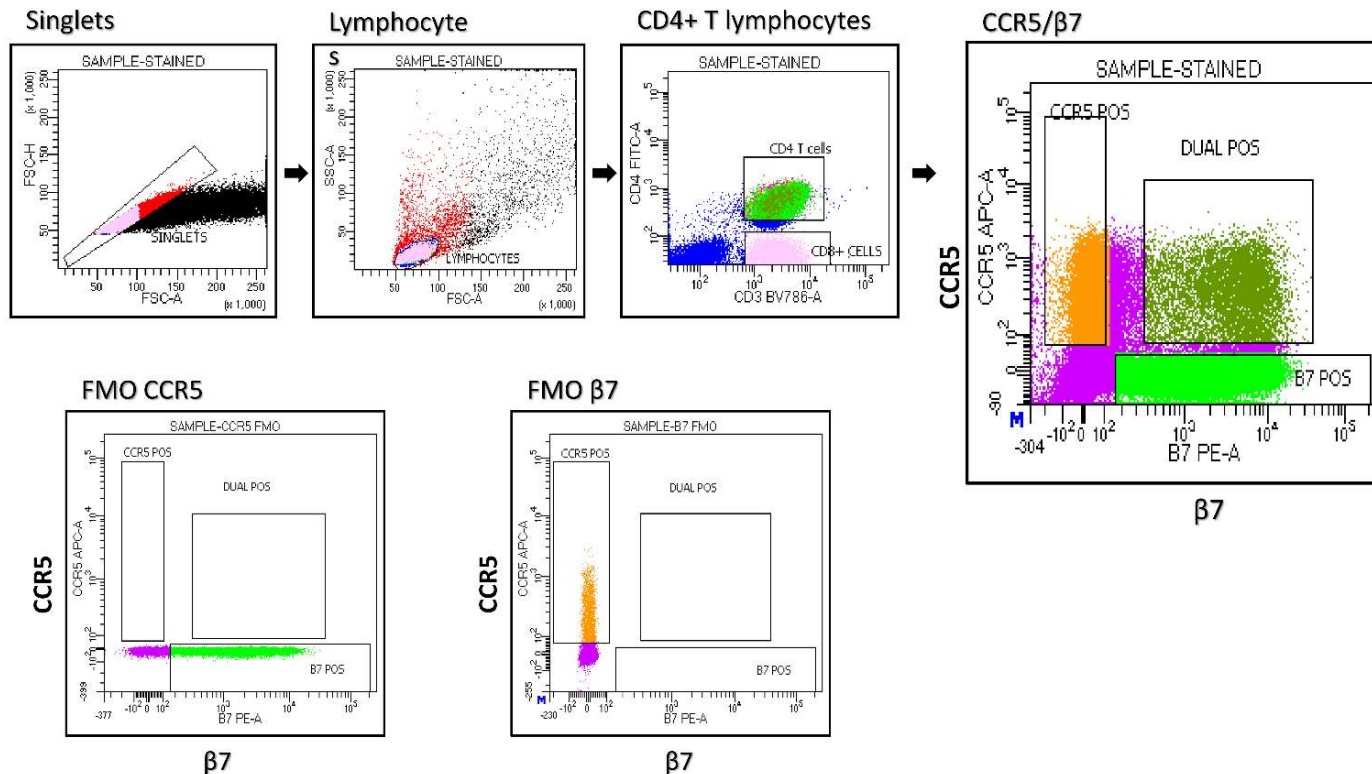

**Supplementary Fig. 1b** - Representative plots displaying gating strategy for FACS sorting of CD4+ T lymphocyte subsets expressing integrin  $\beta 7$  and co-receptor CCR5 with fluorescence minus one (FMO) controls. Three populations were sorted; CD4+ T cells singly positive for  $\beta 7$ , singly positive for CCR5 and dual-positive for both.

## Supplementary Fig.2: Workflow for trans-infection of T lymphocyte subsets

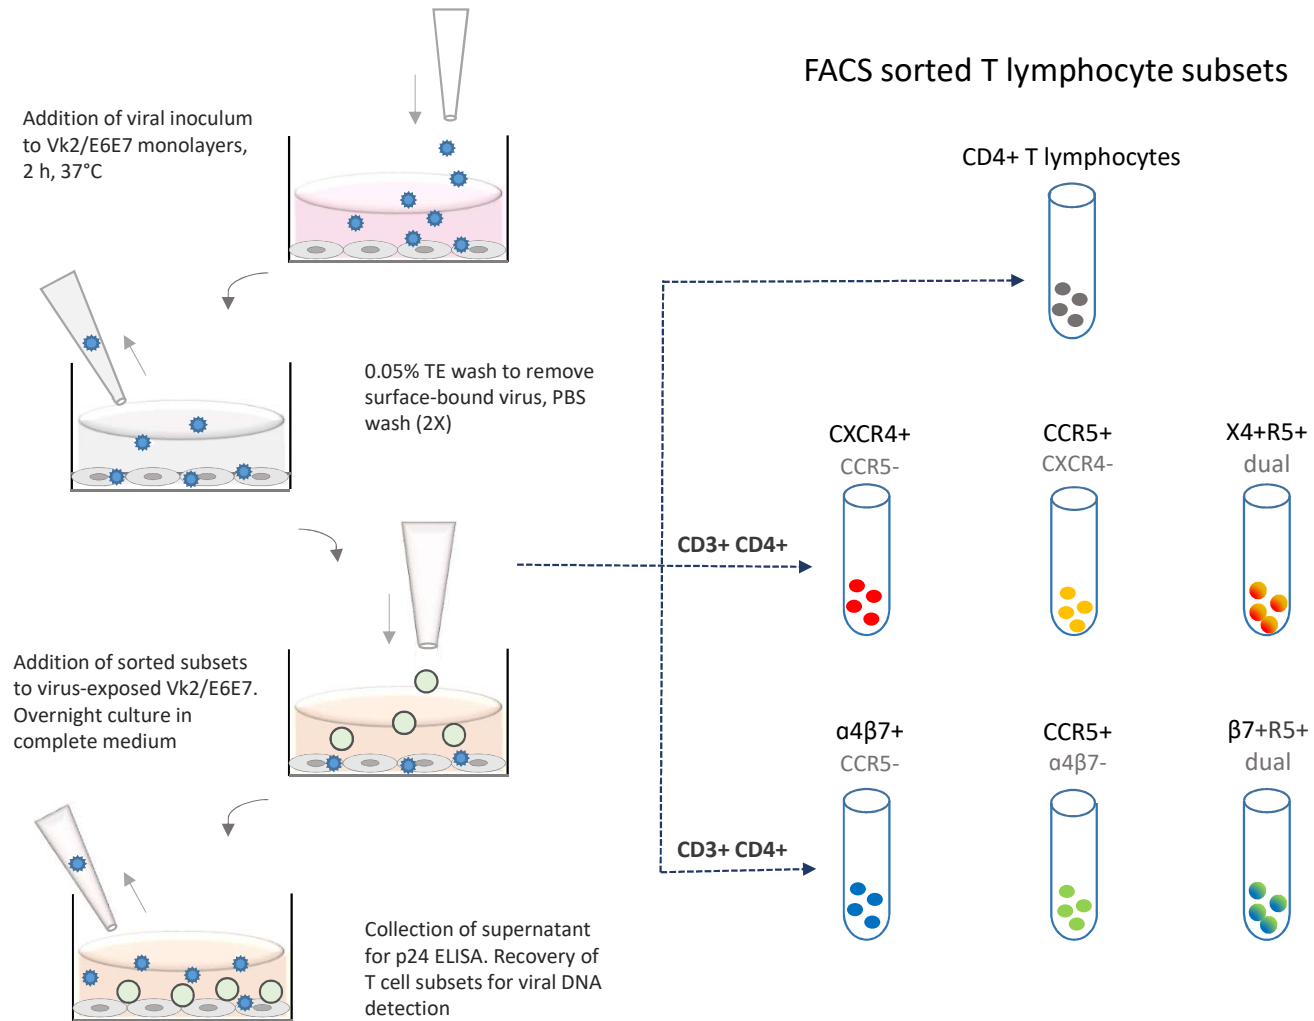

**Supplementary Fig.3: Gating strategy for vaginal epithelial cells**

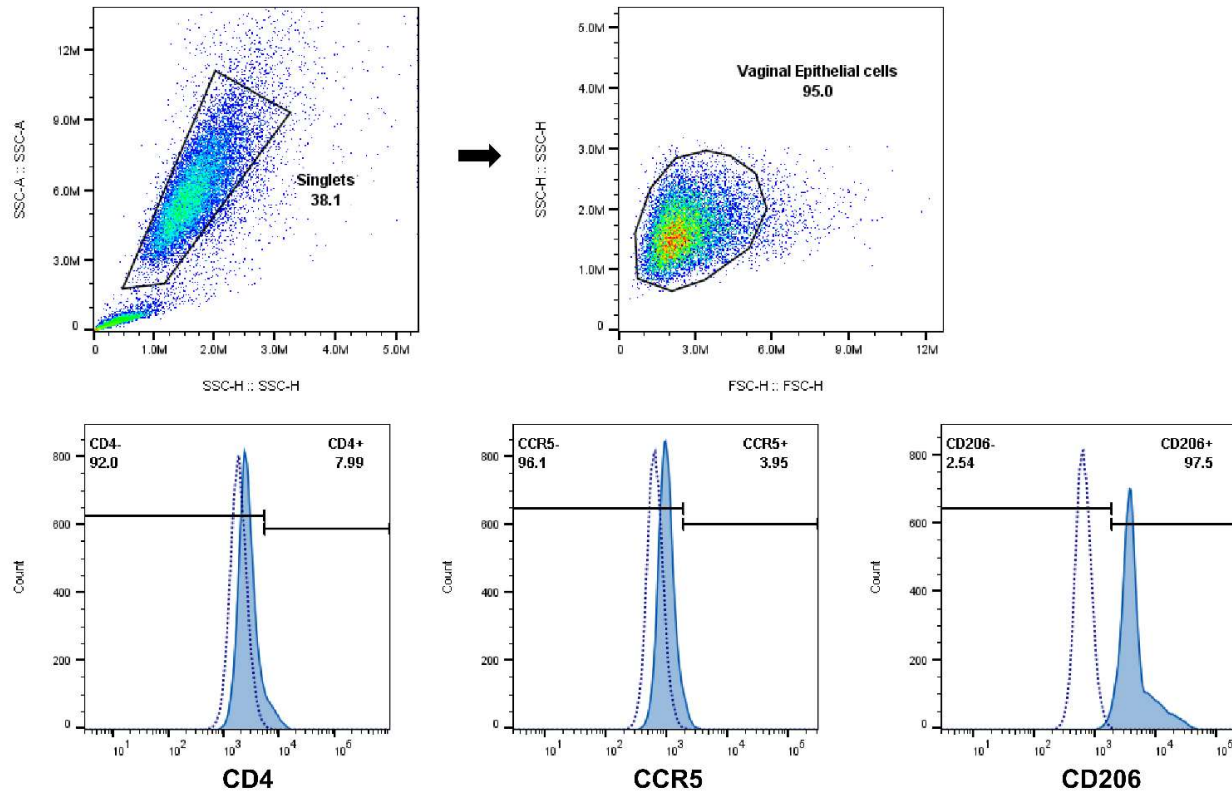

**Supplementary Fig.3** - Representative scatter plots and histograms showing gating strategy for vaginal epithelial cells in a HIV-seronegative participant. Plots were generated using FlowJo version 10.6.

**Supplementary Fig.4: Expression of hMR in Vk2/E6E7**

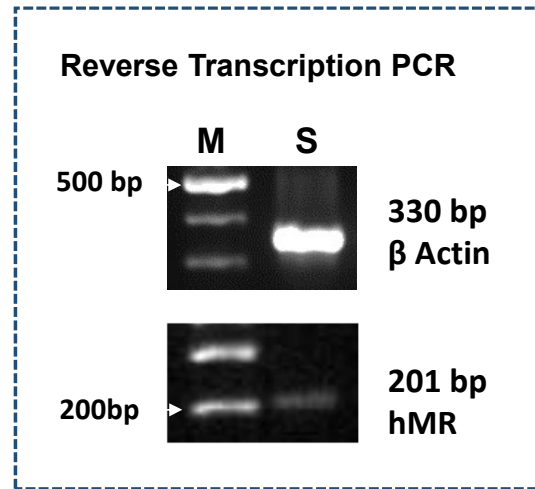

**Supplementary Fig.4** - Reverse transcription PCR to detect human mannose receptor (hMR) expression (bottom panel) in Vk2/E6E7 cell line with  $\beta$ -actin control (top panel).

### Supplementary Fig.5: Detection of Viral DNA

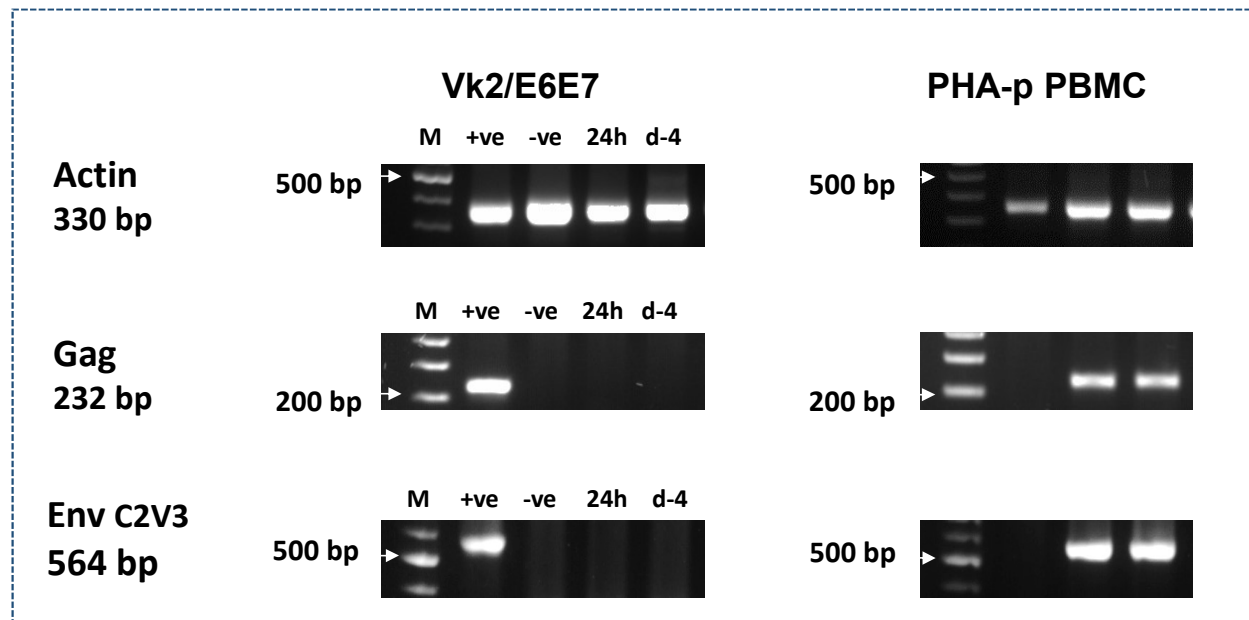

**Supplementary Fig. 5** - Viral DNA detection- Absence of detectable amplification of HIV-1 gag (2nd panel) and env C2V3 (3rd panel) in Vk2/E6E7 cells at 24h and day-4 post-viral exposure, whereas distinct bands visible for PHA-p stimulated PBMCs at both time-points.  $\beta$ -actin control for both cell types (1st panel).

**Supplementary Fig.6: Effect of HIV-1 on integrity of vaginal epithelium**

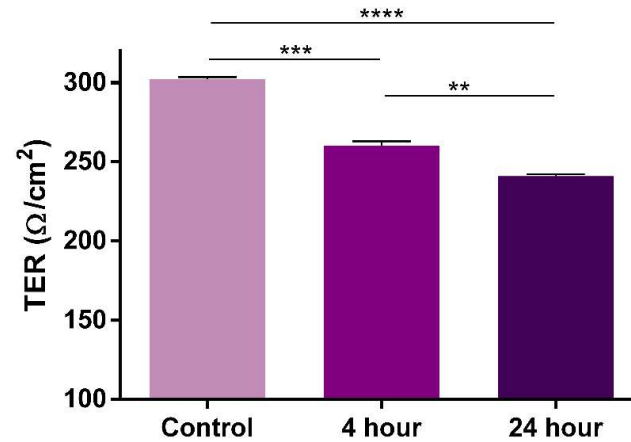

**Supplementary Fig.6** - Bar graph showing significant decline in trans-epithelial resistance of Vk2/E6E7 monolayer at 4 h & 24 h post-viral exposure compared to untreated controls. Results are representative of at least three independent experiments. Statistical comparisons were made using paired t test, \*\*  $P < 0.01$ , \*\*\*  $P < 0.001$ , \*\*\*\*  $P < 0.0001$
